# Supplementary material for: Single-cell genomics for dissection of complex malaria infections
Source: HighWire-hosted journal article supplement (doi:10.1101/gr.168286.113), 2014-05-08
Supplement: Supplemental_Dataset_1.xlsx [file Supplemental_Dataset_1.xlsx]

## Sheet: P_falciparum_genotyping_data
SNP ID				Failed																	Passed 3D7
Names	Hb3	3D7		15A	15B	18A	18B	20A	20B	22A	22B	23A	23B	24A	24B	4A	4B	5A	5B		11A	11B	10A	10B	13A	13B	14A	14B	16A	16B	17A	17B	19A	19B	1A	1B	1B	21A	21B	2A	2B	3A	3B	6A	6B	7A	7B	8A	8B
MAL01-354427	CC	CC		TC	TC	CC	TC	--	--	--	--	--	TC	TT	CC	CC	CC	CC	TC		--	--	--	--	CC	CC	--	--	--	--	CC	CC	CC	CC	CC	CC	CC	CC	CC	CC	CC	CC	CC	--	--	CC	CC	--	--
MAL01-539149	GG	AA		--	--	--	--	--	--	--	--	--	--	AA	--	--	--	--	--		--	--	--	--	--	--	AA	AA	--	--	--	--	--	--	--	--	AA	--	--	--	--	--	--	--	AA	--	AA	--	AA
MAL02-217337	TT	--		--	TA	--	TT	--	--	--	--	--	--	--	--	--	--	--	TA		--	--	--	--	--	--	AA	AA	--	--	--	--	--	--	--	--	--	--	--	--	--	--	--	--	--	--	--	--	--
MAL02-322398	AA	AA		AG	AA	AA	--	--	--	--	--	AG	AG	GG	GG	--	--	AG	AA		--	--	--	--	AA	AA	AA	AA	--	--	--	--	AA	AA	AA	AA	AA	--	--	--	--	--	--	AA	AA	--	AA	AA	AA
MAL02-660994	TT	TT		--	--	--	--	--	--	--	--	--	--	--	--	--	--	--	CC		--	--	--	--	--	--	--	--	--	--	--	--	TT	TT	TT	--	TT	--	--	TT	TT	TT	TT	--	--	TT	TT	--	TT
MAL03-249686	TT	--		--	TT	TT	TT	--	--	TC	TC	TC	TC	TT	--	--	--	--	TC		TT	TT	TT	TT	--	--	--	--	--	--	--	--	--	--	--	--	--	TT	TT	--	--	--	--	TT	TT	--	TT	--	--
MAL03-439621	AA	AA		--	--	--	AG	--	--	--	--	--	--	--	--	--	--	--	--		--	--	--	--	--	--	AA	AA	--	--	--	--	--	--	--	--	--	AA	AA	AA	AA	--	--	AA	AA	--	AA	AA	AA
MAL03-704420	TT	TT		TT	TT	TT	TT	--	--	--	--	--	--	TT	--	--	--	--	TC		TT	TT	--	--	TT	TT	TT	TT	--	--	--	--	TT	TT	TT	TT	TT	TT	TT	TT	TT	--	--	--	--	TT	TT	TT	TT
MAL03-748204	GG	GG		GG	AG	AG	AG	--	--	GG	GG	AG	AG	GG	AG	GG	GG	GG	GG		GG	GG	--	--	--	--	GG	GG	--	--	--	--	GG	GG	GG	--	GG	GG	GG	--	--	--	--	GG	GG	GG	GG	GG	GG
MAL03-822470	GG	AA		--	--	--	--	--	--	--	--	--	--	AA	GG	GG	GG	GG	GG		--	--	--	--	--	--	AA	AA	--	--	--	--	--	--	AA	--	AA	--	--	AA	AA	AA	AA	AA	AA	--	--	--	--
MAL04-1037032	AA	AA		GG	--	--	AG	--	--	--	--	--	--	AG	AA	--	--	AG	GG		--	--	AA	AA	--	--	--	--	--	--	AA	AA	AA	AA	--	--	AA	--	--	--	--	--	--	--	--	AA	AA	--	--
MAL04-1101563	CC	--		--	--	--	--	--	--	--	--	--	--	--	--	--	--	--	--		AA	AA	--	--	--	--	--	--	--	--	--	--	--	--	--	--	--	--	--	--	--	AA	AA	--	--	--	--	--	--
MAL04-1140617	AA	AA		--	--	--	--	--	--	--	--	--	--	--	--	--	--	--	AA		AA	AA	--	--	--	--	--	--	--	--	--	--	--	--	--	--	--	--	--	--	--	AA	AA	--	--	--	AA	--	--
MAL04-268436	TT	CC		TC	--	CC	TC	--	--	--	CC	TC	TC	CC	TC	TT	TT	TC	TC		CC	CC	--	--	CC	CC	--	--	CC	CC	CC	CC	CC	CC	CC	CC	CC	CC	CC	CC	CC	--	--	CC	CC	--	CC	CC	CC
MAL04-307321	AA	GG		--	GG	GG	GG	--	--	GG	GG	--	--	AG	GG	--	--	--	GG		GG	GG	--	--	GG	GG	GG	GG	--	--	--	--	GG	GG	GG	GG	GG	GG	GG	GG	GG	--	--	--	GG	GG	GG	GG	GG
MAL04-393114	CC	AA		AC	AC	AC	AC	--	--	--	--	AC	AC	AA	AA	--	--	AC	AC		AA	AA	AA	AA	--	--	--	--	--	--	AA	AA	AA	AA	--	--	--	AA	AA	--	--	--	--	--	--	AA	AA	--	--
MAL04-443828	AA	AA		AA	AA	AA	AA	--	--	--	--	AG	AA	AA	AA	--	--	AA	AA		AA	AA	--	--	--	--	AA	AA	AA	AA	AA	AA	AA	AA	AA	--	AA	AA	AA	AA	AA	--	--	--	--	AA	AA	AA	AA
MAL04-469608	GG	AA		GG	AG	AG	GG	--	--	--	--	GG	AG	AA	AG	--	--	--	--		AA	AA	AA	AA	AA	AA	--	--	AA	AA	AA	AA	--	--	AA	AA	AA	AA	AA	AA	AA	--	--	AA	AA	--	--	AA	AA
MAL04-494108	TT	AA		TT	TA	TA	TT	--	--	--	--	TA	TT	AA	AA	--	--	--	TA		AA	AA	AA	AA	--	--	--	--	--	--	AA	AA	--	--	AA	--	AA	AA	AA	--	--	AA	AA	--	--	--	--	--	--
MAL04-933828	GG	GG		--	GG	GG	GG	--	--	--	GG	--	GG	GG	GG	--	--	--	GG		--	--	--	--	GG	GG	--	--	--	--	GG	GG	GG	GG	--	GG	--	--	--	GG	GG	GG	GG	GG	GG	--	GG	GG	GG
MAL05-118209	AA	AA		AA	--	AA	AA	--	--	--	--	GG	GG	AA	--	--	--	GG	GG		AA	AA	--	--	AA	AA	--	--	--	--	--	--	AA	AA	--	AA	--	AA	AA	--	--	AA	AA	--	--	AA	AA	AA	AA
MAL05-385372	TC	--		TT	TC	TC	TC	--	--	CC	CC	TC	TC	TC	CC	--	--	CC	TC		CC	CC	--	--	CC	CC	--	--	--	TC	--	--	TC	TC	--	CC	--	CC	TC	--	--	CC	CC	CC	TC	--	CC	CC	CC
MAL05-720978	AA	AA		AG	AA	AA	AG	--	--	--	--	AG	AG	--	AA	--	--	AA	AA		AA	AA	AA	AA	--	--	AA	AA	--	--	AA	AA	AA	AA	AA	--	AA	AA	AA	--	--	--	--	--	--	AA	AA	AA	AA
MAL06-1184507	GG	AA		--	--	--	--	--	--	--	--	--	--	--	--	--	--	GG	AG		AA	AA	--	--	--	--	--	--	--	--	--	--	--	--	AA	--	AA	AA	AA	AA	AA	--	--	--	--	AA	AA	AA	AA
MAL06-1206499	GG	GG		--	--	--	--	--	--	--	--	--	--	--	--	--	--	--	GG		GG	GG	--	--	GG	GG	--	--	--	--	GG	GG	--	--	--	GG	--	GG	GG	--	--	--	--	--	--	--	--	GG	GG
MAL06-410691	AA	GG		--	--	--	AG	--	--	GG	GG	GG	GG	GG	GG	--	--	AA	--		--	--	--	--	--	--	--	--	GG	GG	--	--	--	--	GG	--	GG	--	--	--	--	GG	GG	--	--	--	--	--	--
MAL06-573730	CC	CC		CC	TC	CC	CC	--	--	--	--	CC	TC	CC	CC	--	--	CC	CC		CC	CC	CC	CC	CC	CC	CC	CC	CC	CC	CC	CC	--	--	--	CC	--	CC	CC	--	--	--	--	CC	CC	--	--	CC	CC
MAL06-593821	TT	CC		TC	TC	TC	TC	--	--	CC	CC	TC	TC	CC	TC	--	--	TC	TC		CC	CC	CC	CC	CC	CC	--	--	CC	CC	--	--	CC	CC	--	CC	--	CC	CC	--	--	--	--	CC	CC	CC	CC	CC	CC
MAL06-937750	AA	GG		GG	GG	GG	GG	--	--	--	--	GG	GG	AG	--	--	--	--	AG		GG	GG	--	--	--	--	--	--	--	--	--	--	GG	GG	GG	--	GG	GG	GG	GG	GG	GG	GG	--	--	GG	GG	GG	GG
MAL07-1122023	GG	--		GG	GG	GG	GG	--	--	--	--	--	GG	--	--	--	AG	--	--		AA	AA	--	--	--	--	--	--	--	--	AA	AA	--	--	AA	--	AA	AA	AA	--	--	--	--	--	--	--	--	AA	AA
MAL07-1289206	CC	TT		TT	--	--	TT	--	--	--	--	--	--	TT	TT	--	--	CC	TC		TT	TT	TT	TT	--	--	--	--	--	--	TT	TT	TT	TT	TT	--	TT	TT	TT	--	--	TT	TT	TT	TT	--	--	TT	TT
MAL07-1311707	CC	CC		CC	CC	CC	CC	--	--	CC	--	CC	CC	CC	CC	--	--	TC	CC		CC	CC	--	--	CC	CC	--	--	CC	CC	--	--	CC	CC	CC	CC	CC	CC	CC	--	--	--	--	CC	CC	--	--	CC	CC
MAL07-1323949	CC	AA		--	CC	AC	AC	--	--	--	--	--	CC	AC	AC	--	--	CC	AC		--	--	--	--	AA	AA	--	--	--	--	--	--	AA	AA	AA	AA	AA	--	--	--	--	AA	AA	--	--	AA	AA	AA	AA
MAL07-476303	GG	GG		CG	GG	--	CG	--	--	--	--	--	--	CG	GG	--	--	GG	GG		GG	GG	GG	GG	--	--	--	--	--	--	--	--	--	--	GG	--	GG	GG	GG	GG	GG	--	--	--	--	GG	GG	GG	GG
MAL07-511352	GG	AA		--	--	--	--	--	--	--	--	--	--	AG	AG	--	--	--	--		--	--	--	--	--	--	--	--	--	--	--	--	--	--	AA	--	AA	--	--	AA	AA	--	--	--	--	--	--	--	--
MAL07-543849	CC	CC		--	--	CC	CC	--	--	--	--	--	--	TC	--	--	--	TC	TC		--	--	--	--	--	--	--	--	CC	CC	--	--	CC	CC	--	--	--	--	--	--	--	CC	CC	--	CC	--	CC	--	CC
MAL07-672051	AA	CC		--	--	--	--	--	--	--	--	--	--	--	--	AA	AA	--	AA		--	--	CC	CC	--	--	CC	CC	--	--	--	--	--	--	--	--	--	--	--	--	--	--	--	--	--	CC	CC	--	--
MAL07-759749	AA	AA		AA	AA	AA	AA	--	--	--	--	AG	AA	AA	AA	--	--	AA	AA		--	--	AA	AA	--	--	AA	AA	AA	AA	AA	AA	AA	--	--	--	--	AA	AA	--	--	AA	AA	AA	AA	AA	AA	AA	AA
MAL08-1057901	AA	CC		AC	CC	CC	CC	--	--	--	--	CC	AC	AC	AC	AA	AA	AA	AA		--	--	--	--	AC	AC	--	--	CC	CC	--	--	CC	CC	--	AC	--	CC	CC	--	--	--	--	--	--	CC	CC	CC	CC
MAL08-1101130	GG	AA		AG	AG	--	--	--	--	--	--	AG	AG	AG	AG	--	--	GG	AG		AA	AA	--	--	AA	AA	--	--	AA	AA	AA	AA	--	--	AA	AA	AA	AA	AA	AA	AA	--	--	--	--	AA	AA	AA	AA
MAL08-1292195	AA	GG		--	--	--	--	--	--	--	--	--	--	--	--	--	--	AG	--		--	--	--	--	--	--	--	--	--	--	--	--	GG	--	--	--	--	GG	GG	--	--	--	--	GG	GG	GG	GG	--	--
MAL08-417613	GG	GG		GG	GG	GG	GG	--	--	--	--	GG	GG	AG	GG	--	--	AG	--		--	--	GG	GG	GG	GG	GG	GG	--	--	--	--	GG	GG	--	GG	--	GG	GG	GG	GG	--	--	GG	GG	--	--	GG	GG
MAL08-477431	TT	AA		--	--	AA	TA	--	--	--	--	--	--	--	AA	--	--	TA	TA		--	--	AA	AA	--	--	--	AA	--	--	--	--	AA	AA	AA	--	AA	AA	AA	--	--	AA	AA	--	AA	AA	AA	--	AA
MAL08-502163	TT	TT		--	--	--	--	--	--	CC	CC	--	--	--	--	--	--	--	TC		--	--	--	--	--	--	--	--	--	--	--	--	TT	TT	TT	--	TT	TT	TT	TT	TT	--	--	TT	TT	--	--	--	--
MAL09-1111191	CC	CC		--	CC	--	--	--	--	--	--	--	--	CC	CC	--	--	CC	CC		--	--	CC	CC	--	--	CC	CC	--	--	CC	CC	--	--	--	--	--	--	--	--	--	CC	CC	CC	CC	--	--	--	--
MAL09-492618	CC	CC		--	--	--	CC	--	--	CC	CC	--	--	CC	--	--	--	--	--		--	--	--	--	--	--	--	--	--	--	CC	CC	--	--	--	--	--	--	--	--	--	CC	CC	--	--	CC	CC	CC	CC
MAL09-631767	TT	CC		--	CC	--	--	--	--	--	--	--	--	TC	TT	--	--	TT	TC		--	--	--	--	--	--	--	--	--	--	--	--	--	--	--	--	--	CC	CC	CC	CC	--	--	--	--	CC	CC	CC	CC
MAL09-692487	CC	CC		CC	CC	--	CC	--	--	--	--	--	CC	--	CC	--	--	--	CC		CC	CC	--	--	--	--	CC	CC	--	--	--	--	CC	CC	CC	--	CC	--	--	CC	CC	--	--	--	--	CC	CC	CC	CC
MAL09-771381	AA	CC		AC	AC	AC	CC	--	--	CC	CC	AC	AC	CC	AC	--	--	--	AC		CC	CC	--	--	--	--	CC	CC	--	--	--	--	CC	CC	CC	--	CC	CC	CC	--	--	--	--	--	--	--	--	CC	CC
MAL10-113266	CC	TT		--	--	--	--	--	--	--	--	--	--	--	--	--	--	--	TC		TT	TT	--	--	--	--	TT	TT	--	--	TT	TT	--	--	--	--	--	TT	TT	TT	TT	--	--	--	--	TT	TT	TT	TT
MAL10-1300115	AA	TT		AT	AT	AT	AT	--	--	--	--	AT	--	AT	--	--	--	AA	AA		--	--	--	--	--	--	TT	TT	--	--	--	--	TT	TT	--	--	--	TT	TT	--	--	--	--	TT	TT	TT	TT	TT	TT
MAL10-1385891	TT	CC		--	--	CC	TC	--	--	CC	--	CC	--	CC	TC	TT	TT	TC	TC		--	--	CC	CC	CC	CC	CC	CC	--	--	--	--	--	--	--	CC	--	CC	CC	--	--	--	--	CC	CC	CC	CC	CC	CC
MAL10-317580	TT	AA		TT	AT	--	AA	--	--	--	--	--	--	--	--	--	--	--	TT		--	--	--	--	--	--	--	--	--	--	--	--	AA	AA	--	--	--	AA	AA	AA	AA	--	--	AA	AA	--	AA	--	--
MAL10-336274	GG	AA		AG	AG	AA	--	--	--	GG	--	AG	--	AG	GG	--	--	AG	AG		AA	AA	AA	AA	--	--	AA	AA	--	AA	--	--	AA	AA	--	--	--	AA	AA	AA	--	--	--	--	--	AA	AA	--	AA
MAL10-404541	AA	AA		--	AG	AG	AG	--	--	--	--	AG	--	GG	AG	--	--	AA	AA		AA	AA	AA	AA	AA	AA	AA	AA	AA	AA	AA	AA	AA	AA	--	AA	--	AA	AA	--	--	--	--	AA	AA	AA	AA	AA	AA
MAL10-631275	TT	TT		--	--	--	--	--	--	--	--	--	--	--	--	--	--	--	TT		TT	TT	--	--	--	--	--	--	--	--	--	--	--	--	--	--	--	TT	TT	TT	TT	--	--	--	--	--	--	TT	TT
MAL10-663198	GG	GG		GG	GG	--	--	--	--	--	--	--	--	TT	--	--	--	--	--		--	--	--	--	GG	GG	--	--	--	--	--	--	GG	GG	--	GG	--	GG	GG	--	--	--	--	--	--	--	--	--	--
MAL11-1331758	AA	AA		--	AA	AA	AA	--	--	AG	AG	--	AA	--	--	--	--	--	--		--	--	AA	AA	--	--	AA	AA	--	--	--	--	AA	AA	--	--	--	--	--	--	--	--	--	AA	AA	--	--	AA	AA
MAL11-1520975	TT	AA		TT	AT	AT	--	--	--	--	--	--	AT	AT	--	--	--	AT	AT		AA	AA	--	--	AA	AA	--	--	--	--	--	--	AA	AA	AA	AA	--	AA	AA	AA	AA	--	--	--	--	--	--	AA	AA
MAL11-1749804	AA	AA		AA	AA	AA	AA	--	--	AG	AG	AA	AA	AA	AA	--	--	AA	AA		--	--	AA	--	--	--	--	--	--	--	--	--	AA	AA	AA	--	AA	AA	AA	AA	AA	AA	AA	AA	AA	AA	AA	AA	AA
MAL11-1802198	GG	GG		GG	GG	GG	GG	--	--	--	GG	--	GG	--	GG	--	--	GG	GG		--	--	GG	GG	GG	GG	--	--	--	--	GG	GG	GG	GG	--	GG	--	GG	GG	GG	GG	GG	GG	GG	GG	--	--	GG	GG
MAL11-185094	GG	AA		AA	AA	AA	AA	--	--	--	--	AG	AA	GG	AG	--	--	AG	AG		--	--	AA	AA	--	--	AA	AA	--	--	AA	AA	AA	AA	AA	--	AA	AA	AA	AA	AA	--	--	--	--	AA	AA	AA	AA
MAL11-255830	GG	AA		AA	AA	AA	AA	--	--	--	--	--	AA	AA	AA	--	--	AG	AG		AA	AA	--	--	AA	AA	AA	AA	AA	AA	AA	AA	AA	AA	--	AA	--	AA	AA	--	--	AA	AA	AA	AA	AA	AA	--	--
MAL11-281726	CC	CC		CC	CC	CC	CC	--	--	--	--	CC	CC	CC	CC	--	--	CC	CC		CC	CC	CC	CC	CC	CC	CC	CC	CC	CC	--	--	--	--	--	CC	--	--	--	--	--	--	--	--	--	CC	CC	--	--
MAL11-304323	TT	TT		TT	TT	TT	TT	--	--	--	--	TC	TT	TT	TT	--	--	TT	TT		TT	TT	TT	TT	TT	TT	TT	TT	TT	TT	TT	TT	--	--	TT	TT	TT	TT	TT	--	--	TT	TT	--	--	TT	TT	TT	TT
MAL11-683964	CC	TT		TT	TT	TC	TT	--	--	--	--	--	TC	TT	TC	--	--	--	TT		TT	TT	--	--	--	--	--	--	--	--	--	--	TT	TT	TT	--	TT	TT	TT	TT	TT	--	--	TT	TT	--	TT	TT	TT
MAL11-769993	CC	AA		AA	--	--	--	--	--	--	--	AC	AC	AA	--	--	--	CC	--		--	--	AA	AA	--	--	--	--	AA	AA	--	--	--	--	--	--	--	AA	AA	AA	AA	AA	AA	--	--	AA	AA	AA	AA
MAL11-896199	GG	GG		GG	GG	--	AG	--	--	GG	--	GG	--	--	AG	--	--	GG	GG		GG	GG	--	--	GG	GG	GG	GG	--	--	GG	GG	--	--	--	GG	--	GG	GG	GG	GG	--	--	GG	GG	--	--	--	--
MAL12-1116275	TT	--		--	CC	CC	CC	--	--	CC	CC	TC	CC	--	--	--	--	TC	TC		--	--	CC	CC	--	--	CC	CC	--	--	--	--	CC	CC	CC	--	CC	CC	CC	--	--	CC	CC	CC	CC	--	--	CC	CC
MAL12-1131597	AA	GG		AG	GG	GG	GG	--	--	--	GG	--	AG	--	AG	--	--	AG	AG		GG	GG	--	--	--	--	GG	GG	--	--	GG	GG	GG	GG	GG	--	GG	GG	GG	--	--	--	--	--	GG	GG	GG	--	--
MAL12-114173	CC	CC		--	CC	--	TC	--	--	--	--	--	--	--	--	--	--	--	--		--	--	CC	CC	--	--	--	CC	CC	CC	--	--	--	--	--	--	--	--	--	CC	CC	CC	CC	CC	CC	--	--	--	--
MAL12-1156125	CC	TT		CC	CC	TC	TC	--	--	--	--	TC	CC	CC	--	CC	CC	CC	CC		TT	TT	TT	TT	--	--	TT	TT	--	--	--	--	TT	TT	--	--	--	TT	TT	--	--	--	--	TT	TT	--	--	--	--
MAL12-1591944	TT	TT		CC	CC	TC	TC	--	--	TC	TC	CC	TC	TT	--	--	--	--	TC		TT	TT	--	--	TT	TT	--	--	--	--	--	--	TT	TT	--	TT	--	--	--	--	--	--	--	--	--	--	--	--	--
MAL12-1761553	CC	TT		--	--	--	--	--	--	--	--	--	--	CC	--	--	--	--	--		--	--	TT	TT	TT	TT	TT	TT	--	--	--	--	TT	TT	TT	TT	TT	TT	--	TT	TT	--	TT	--	--	--	--	TT	TT
MAL12-2046727	GG	AA		AA	AA	AA	AA	--	--	AG	AG	--	AA	AA	AG	--	--	--	AG		AA	AA	AA	AA	--	--	--	--	--	--	--	--	AA	AA	AA	--	AA	--	--	AA	AA	--	--	--	--	AA	AA	AA	AA
MAL12-262199	GG	GG		GG	GG	GG	GG	--	--	GG	GG	GG	GG	GG	GG	--	--	GG	GG		GG	GG	GG	GG	GG	GG	GG	GG	--	--	--	--	GG	GG	GG	GG	GG	GG	GG	GG	GG	--	--	GG	GG	GG	GG	GG	GG
MAL12-529412	CC	CC		--	--	--	--	--	--	CC	CC	--	--	CC	--	--	--	--	TC		CC	CC	--	--	--	--	--	--	--	--	--	--	--	--	--	--	--	--	--	--	--	--	--	--	--	--	--	--	--
MAL12-83177	TT	TT		--	--	--	--	--	--	--	--	--	--	--	--	--	--	--	TT		--	--	--	--	--	--	--	--	TT	TT	--	--	--	--	--	--	--	TT	TT	--	--	--	--	TT	TT	TT	TT	--	--
MAL13-1233419	TT	TT		--	TT	TT	TC	--	--	--	--	--	TC	CC	--	--	--	--	--		TT	TT	--	--	--	--	TT	TT	--	--	TT	TT	TT	TT	--	--	--	TT	TT	TT	TT	--	--	TT	TT	--	--	TT	TT
MAL13-146947	AA	AA		--	AG	--	--	--	--	AG	AG	AG	AG	AA	AA	--	--	--	AA		AA	AA	--	--	--	--	AA	AA	AA	AA	--	--	--	--	--	--	--	AA	AA	AA	AA	--	--	AA	AA	AA	AA	AA	AA
MAL13-1966774	AA	AA		AA	AG	AG	AG	--	--	--	--	--	AG	AA	AA	--	--	--	AA		--	--	AA	AA	--	--	AA	AA	--	--	AA	AA	--	--	AA	--	AA	AA	AA	--	--	--	--	AA	AA	AA	AA	AA	AA
MAL13-210569	TT	TT		TC	TC	--	--	--	--	--	--	--	TC	CC	TC	--	--	--	--		--	--	--	--	--	--	--	--	TT	TT	TT	TT	--	--	--	--	--	TT	TT	TT	TT	--	--	--	--	TT	TT	TT	TT
MAL13-2158308	--	--		--	--	--	--	--	--	--	--	--	--	--	--	--	--	--	--		--	--	--	--	TT	TT	TT	TT	--	--	--	--	--	--	--	TT	--	--	--	TT	TT	--	--	--	--	--	--	--	--
MAL13-2570163	AA	AA		--	AA	AA	--	--	--	--	--	AA	--	AA	--	--	--	AA	--		AA	AA	AA	AA	AA	AA	--	AA	AA	AA	--	--	--	--	--	AA	--	AA	AA	AA	AA	--	--	--	--	AA	AA	AA	AA
MAL13-619422	AA	AA		AA	--	--	AA	--	--	--	--	--	--	--	--	--	--	--	AA		--	--	--	--	AA	AA	--	--	--	--	AA	AA	AA	AA	AA	AA	AA	AA	AA	--	--	AA	AA	--	--	AA	AA	AA	AA
MAL14-1199184	TT	AA		AT	TT	--	--	--	--	--	--	--	--	AT	--	TT	TT	AT	--		AA	AA	AA	AA	--	--	AA	AA	--	--	--	--	--	--	AA	--	AA	AA	AA	--	--	--	--	AA	AA	AA	AA	--	AA
MAL14-1458321	AA	AA		--	AG	AG	AG	--	--	AG	AG	AG	AG	AA	AA	--	--	AA	--		AA	AA	--	--	--	--	AA	AA	AA	AA	--	--	AA	AA	--	--	--	AA	AA	AA	AA	AA	AA	AA	AA	AA	AA	--	--
MAL14-1757546	AA	AA		--	--	--	AG	--	--	--	--	--	--	--	AA	--	--	--	--		--	--	AA	AA	--	--	--	--	AA	AA	AA	AA	AA	AA	--	--	--	--	--	--	--	--	--	--	--	--	--	AA	AA
MAL14-1853537	GG	AA		AG	AG	AG	--	--	--	--	--	--	--	AA	--	--	--	--	--		AA	AA	AA	AA	--	--	AA	AA	--	--	--	--	--	--	AA	--	AA	--	--	AA	AA	--	--	AA	AA	AA	AA	AA	AA
MAL14-3017684	AA	AA		--	--	AA	TA	--	--	AA	AA	--	--	AA	TA	--	--	--	--		--	--	AA	AA	--	--	--	--	AA	AA	--	--	AA	AA	--	--	--	AA	AA	--	--	--	--	--	--	AA	AA	AA	AA
MAL14-3124926	GG	GG		--	--	GG	--	--	--	--	--	--	--	--	GG	--	--	--	--		--	--	--	--	GG	GG	--	--	--	--	--	--	--	--	GG	GG	GG	--	--	GG	GG	--	--	--	--	--	GG	GG	GG
MAL14-990875	TT	TT		TT	TT	TT	TT	--	--	--	--	--	--	TT	TT	--	--	TC	--		TT	TT	--	--	TT	TT	TT	TT	--	--	--	--	TT	TT	--	TT	--	TT	TT	TT	TT	--	--	--	--	TT	TT	TT	TT
Mixed				16	21	17	25	0	0	7	7	23	24	16	18	0	1	19	30		0	0	0	0	1	1	0	0	0	1	0	0	1	1	0	1	0	0	1	0	0	0	0	0	1	0	0	0	0
Missing				41	32	38	31	92	92	69	69	54	45	28	39	83	82	43	26		43	43	55	56	58	58	51	48	68	66	62	62	39	41	51	58	50	27	28	49	50	65	64	53	48	43	31	34	28
Called				35	39	37	36	0	0	16	16	15	23	48	35	9	9	30	36		49	49	37	36	33	33	41	44	24	25	30	30	52	50	41	33	42	65	63	43	42	27	28	39	43	49	61	58	64
