# Supplementary material for: Single-cell genomics for dissection of complex malaria infections
Source: HighWire-hosted journal article supplement (doi:10.1101/gr.168286.113), 2014-05-08
Supplement: Supplemental_Dataset_2.xlsx [file Supplemental_Dataset_2.xlsx]

## Sheet: P_vivax_genotyping_data
	Population genotyping
	DEM4028	VHX355	WPP3160	WPP1553	UPS02	UPS14	UPS51	VHX302	WPA3467_A	WPA3467_B	WPP032	WPP071	WPP3166	WPP3793	WPP1476	WPP4696	VHX395	WPP5792	WPP11026	MKK020	MLA053	MKK083	WPP1045	DCV485	DCV497	UPS051	WPP227	WPP8518	WPP11413	WPP188	UPS107	UPS002	WPP020	MKK134	WPP1056	PLU319	WPP2192	WP2514	PLU192	MKK953	DEM4016	DMA023	WPP0401	VHX008	MKK1944	WPP0152	MKK1042	GSM153	DMA242
Pv01_655621	CC	CC	CC	CC	TT	TC	TC	CC	CC	CC	TT	CC	CC	CC	CC	CC	CC	TT	CC	CC	CC	CC	TC	CC	TC	TT	CC	CC	TC	CC	CC	TT	TC	CC	CC	TC	CC	TT	TT	TT	CC	CC	TT	TT	CC	--	TC	CC	CC
Pv01_737143	CC	CC	CC	GG	GG	GC	GC	GG	GG	GG	CC	GG	CC	GG	GC	CC	CC	CC	CC	CC	GC	CC	CC	GG	CC	GG	CC	GG	CC	CC	GG	GG	GC	GC	CC	CC	GG	CC	CC	CC	CC	GG	CC	GG	CC	--	GC	CC	CC
Pv02_627583	GG	GG	GG	GG	GG	GG	GG	GG	--	--	GG	GG	GG	GG	--	GG	GG	GG	GG	GG	GG	GG	GG	GG	GG	--	GG	GG	GG	GG	GG	GG	GG	GG	--	GG	GG	GG	GG	--	GG	--	GG	GG	GG	--	GG	--	GG
Pv02_689038	--	CC	TT	TT	--	TT	TT	TT	TT	TT	CC	--	TT	TT	TT	CC	TC	TT	CC	CC	TC	TT	TT	TT	TC	TT	TT	TC	TT	CC	CC	--	TC	TC	TT	CC	CC	CC	CC	TT	TC	TC	TT	TT	CC	--	TT	CC	TC
Pv03_301681	TT	CC	TT	TT	TT	TC	TT	TT	TT	TT	TT	TT	CC	CC	TC	CC	TT	TT	TT	TT	TC	TT	CC	TT	TC	TT	TC	TT	TC	TT	TT	TT	TC	TT	TC	CC	CC	TT	TT	CC	CC	CC	CC	CC	TC	--	TC	TT	TT
Pv03_594923	CC	CC	CC	CC	CC	TC	CC	CC	CC	CC	CC	TT	CC	CC	TT	CC	TC	CC	CC	TT	TC	CC	TT	TT	TC	CC	CC	CC	TC	CC	CC	CC	CC	CC	TC	TC	CC	TT	CC	CC	CC	CC	CC	TT	CC	--	TC	CC	CC
Pv03_717122	CC	TT	TT	TC	TT	TC	TC	TT	TT	TT	TT	TT	TT	TT	TT	TC	TC	TT	TT	CC	TT	TT	TT	TC	TT	TC	TC	TT	CC	TC	TT	TT	TC	TC	CC	TC	TT	TT	TT	TT	TT	TC	CC	TT	TT	--	CC	CC	TT
Pv03_785501	CC	TT	TT	TC	TC	TC	CC	CC	CC	CC	--	CC	CC	CC	CC	TT	TC	CC	TC	TT	TC	CC	TT	TT	TC	CC	TT	CC	TC	TT	CC	TC	TC	TC	TC	TC	CC	TT	TT	TT	TT	TC	TT	CC	CC	--	TC	CC	TC
Pv04_370876	AA	CC	AA	AA	AC	AC	AA	AA	CC	CC	CC	CC	CC	AA	AC	AA	AA	AA	AA	AA	CC	AA	AC	AA	CC	AA	CC	CC	AC	CC	AA	AC	AA	CC	CC	AA	CC	CC	AA	CC	AA	AA	CC	AA	CC	--	AC	AA	CC
Pv04_508314	AA	GG	AA	AA	GG	AG	AA	GG	AG	AG	AA	AA	AA	GG	AA	AA	AA	AA	AA	AA	AG	AA	AA	GG	AA	AA	AA	AA	AG	GG	AA	GG	AG	AA	AA	AA	AA	GG	AA	AA	AA	AA	AA	AA	AG	--	AA	GG	AA
Pv04_696267	CC	--	CC	CC	CC	CC	CC	--	CC	CC	CC	CC	CC	CC	CC	CC	CC	CC	CC	CC	CC	CC	CC	CC	CC	CC	CC	CC	CC	--	CC	CC	CC	--	CC	CC	CC	--	--	CC	CC	--	CC	TT	CC	--	CC	CC	CC
Pv04_792480	AA	AA	GG	AA	AA	AA	AG	AA	AA	AA	AA	AA	AA	AA	GG	GG	GG	GG	AA	GG	AG	GG	AG	AA	AG	GG	GG	GG	AG	GG	GG	AA	GG	AG	AA	AG	AA	GG	AA	GG	GG	AG	AA	GG	AG	--	AG	GG	AG
Pv05_1104008	CC	TT	TT	TT	TT	TT	CC	CC	TT	TT	TT	CC	CC	CC	CC	TT	TT	CC	TT	TT	TT	TT	CC	TT	TT	CC	TC	TT	TC	TT	TT	TT	CC	TT	TC	TC	CC	TT	TT	TT	TT	TT	TT	TT	TT	--	TT	TT	TC
Pv05_1201371	CC	AA	AA	AA	AA	AC	AA	CC	CC	CC	AA	AA	AA	AA	AC	AA	AC	CC	AC	AA	AA	CC	AA	CC	AC	AA	AA	AA	AA	AA	CC	AA	AA	AC	AC	AC	CC	CC	CC	AA	AC	CC	AA	CC	AA	--	AC	CC	CC
Pv05_1216806	GG	GG	GG	GG	TG	TG	TT	GG	GG	GG	TT	GG	GG	GG	GG	TT	TG	GG	GG	GG	TG	GG	GG	GG	TG	TT	GG	TT	GG	GG	GG	GG	GG	GG	TG	GG	GG	GG	GG	GG	GG	TT	GG	GG	TG	--	TG	TT	GG
Pv05_179561	GG	GG	GG	GG	GG	GG	GG	GG	GG	GG	GG	GG	CG	GG	GG	GG	GG	GG	GG	GG	GG	GG	GG	GG	GG	GG	CG	GG	GG	GG	GG	GG	GG	CG	GG	GG	GG	GG	GG	GG	GG	GG	GG	CC	GG	--	GG	GG	GG
Pv05_323176	GG	CC	GG	GG	GG	GC	GG	GG	GC	GG	GG	GG	GG	GG	GG	GG	CC	GG	GG	CC	GC	GG	GG	GG	GG	GG	CC	CC	GG	GG	GG	GG	GG	GC	CC	GG	GG	GG	CC	GG	GG	GG	GG	CC	GG	--	GG	CC	GC
Pv05_499928	CC	CC	CC	CC	CC	CC	CC	CC	CC	CC	CC	CC	CC	CC	CC	CC	CC	CC	CC	CC	CC	CC	CC	CC	CC	CC	CC	CC	--	TT	CC	CC	--	CC	CC	CC	CC	CC	CC	CC	CC	CC	CC	CC	CC	--	CC	CC	CC
Pv05_538751	GG	GG	GG	TG	GG	GG	TT	GG	TG	TG	GG	TT	GG	GG	TG	GG	GG	GG	GG	TT	TG	GG	TT	TT	GG	TT	GG	TT	GG	GG	TT	GG	GG	GG	TT	GG	GG	GG	GG	GG	GG	TT	TT	GG	TG	--	TG	GG	TG
Pv06_126837	CC	GG	CC	GC	CC	CC	CC	CC	GC	CC	CC	CC	CC	CC	GC	CC	CC	CC	GG	GG	GG	--	CC	CC	GC	CC	CC	CC	GG	CC	CC	CC	GG	GG	CC	CC	CC	CC	GG	CC	CC	CC	CC	GG	GG	--	GC	CC	CC
Pv06_274421	GG	GG	GG	GG	GG	GG	GG	GG	GG	GG	GG	AA	GG	GG	GG	GG	GG	GG	GG	GG	GG	GG	GG	GG	GG	GG	GG	GG	GG	GG	GG	GG	GG	GG	GG	GG	GG	GG	GG	GG	GG	GG	AA	GG	GG	--	GG	GG	GG
Pv06_488587	CC	CC	CC	CC	CC	TC	CC	TT	CC	CC	CC	CC	TT	CC	CC	CC	CC	CC	CC	CC	TC	CC	CC	CC	CC	CC	CC	CC	CC	TT	CC	CC	CC	CC	CC	TC	CC	CC	CC	CC	TC	CC	TT	CC	CC	--	CC	CC	CC
Pv06_891710	CC	CC	CC	TT	CC	TC	TT	CC	CC	CC	--	CC	CC	CC	TC	CC	CC	CC	CC	CC	CC	TT	CC	CC	CC	TT	CC	TT	CC	CC	CC	CC	TC	CC	TC	CC	CC	CC	CC	CC	TC	CC	CC	CC	TC	--	TC	CC	CC
Pv06_980923	CC	CC	CC	CC	CC	CC	CC	CC	CC	CC	CC	AA	AA	AA	CC	CC	CC	CC	CC	AA	CC	CC	CC	CC	AA	CC	CC	AA	AC	CC	AA	CC	AC	CC	CC	AC	CC	CC	CC	CC	CC	AA	CC	CC	CC	--	CC	CC	CC
Pv06_999554	CC	CC	CC	CC	CC	TC	CC	CC	CC	CC	CC	CC	CC	TT	CC	CC	CC	CC	CC	CC	TC	CC	TT	TT	TT	CC	CC	CC	CC	CC	CC	CC	TC	TC	CC	TC	CC	CC	CC	CC	CC	TC	CC	CC	CC	--	TC	CC	TT
Pv07_1140487	TC	TT	CC	TC	TT	TC	CC	CC	TT	TT	CC	TT	CC	CC	TC	CC	CC	TT	TC	TT	TT	TT	TC	TT	TC	CC	TT	TC	TT	TT	TT	TT	TT	TT	TC	TT	TT	TT	TT	TT	CC	CC	TT	TT	TC	--	TT	CC	TT
Pv07_1294884	TT	CC	TT	CC	CC	TC	CC	CC	CC	CC	TT	CC	TC	CC	CC	TT	CC	CC	TC	CC	TT	CC	TT	CC	TC	CC	CC	CC	TC	TT	CC	CC	TC	TC	CC	TC	CC	CC	CC	TT	TC	CC	TT	CC	TT	--	TC	TT	CC
Pv07_141420	GG	GG	AA	GG	GG	GG	AG	GG	GG	GG	GG	GG	GG	AA	GG	AA	AG	AA	GG	GG	GG	GG	GG	GG	GG	AA	GG	GG	AG	GG	GG	GG	AG	AG	AG	GG	GG	GG	GG	GG	GG	AG	GG	GG	GG	--	GG	GG	GG
Pv07_14335	CC	CC	CC	CC	CC	TC	CC	CC	CC	CC	CC	TT	CC	CC	TC	CC	CC	CC	CC	CC	CC	CC	CC	CC	CC	CC	CC	CC	CC	CC	CC	CC	CC	CC	CC	CC	CC	CC	CC	TT	TC	CC	CC	TT	CC	--	CC	CC	CC
Pv07_303395	GG	GG	GG	GG	GG	GG	GG	GG	GG	GG	GG	GG	GG	GG	GG	GG	GG	GG	GG	GG	GG	GG	GG	GG	GG	GG	GG	GG	GG	GG	GG	GG	GG	GG	GG	GG	GG	GG	GG	GG	GG	GG	GG	GG	GG	--	GG	GG	GG
Pv07_672072	AA	AA	AA	CC	AC	AC	AA	CC	CC	CC	CC	AA	AA	CC	CC	CC	CC	CC	AA	CC	AA	CC	CC	AA	AC	AA	AC	CC	AC	CC	CC	AC	AC	AC	CC	CC	CC	AA	CC	CC	AC	CC	CC	CC	AC	--	CC	CC	CC
Pv07_73440	CC	CC	GG	CC	CC	CC	CC	GG	CC	CC	CC	GG	CC	CC	CC	CC	GC	CC	CC	CC	CC	CC	GG	GG	CC	CC	GG	CC	CC	CC	CC	CC	CC	GC	CC	CC	CC	CC	CC	CC	CC	CC	CC	CC	CC	--	CC	CC	CC
Pv07_823425	AA	GG	AA	AA	AA	AG	AA	GG	GG	GG	AA	AA	AA	GG	AG	AA	GG	GG	AG	GG	GG	GG	AA	GG	AA	AA	GG	AG	AG	GG	GG	AA	AA	AA	AA	GG	GG	GG	GG	GG	GG	GG	AA	GG	AG	--	AG	AA	AA
Pv08_108957	TC	CC	TT	TT	TT	TC	TT	TT	TT	TT	TT	CC	TT	CC	TT	TT	TC	TT	CC	TT	TT	CC	CC	TT	TT	TT	TT	TT	TT	TT	TT	TT	TC	TC	TT	TT	TT	TT	TT	CC	TT	CC	CC	CC	TC	--	TT	TT	TT
Pv08_1598514	TC	CC	CC	CC	CC	TC	CC	TT	TT	TT	CC	CC	TC	TT	TT	CC	TT	TT	TT	CC	TT	CC	CC	TT	TT	CC	TT	CC	TC	TT	TT	CC	TC	TC	TT	TT	CC	CC	CC	TT	TC	TT	TT	CC	TC	--	TC	TT	CC
Pv08_293076	TT	TT	TT	TT	TC	TC	TT	TT	TT	TT	TT	TT	TT	TT	TT	TT	TC	TT	CC	CC	TC	TT	TT	TT	TC	TT	TC	TT	TT	TT	TT	TC	TC	TC	TT	TC	TT	TT	CC	TT	TT	TC	TT	TT	TC	--	TT	CC	TT
Pv08_702981	--	AG	AG	GG	GG	AG	GG	GG	AG	AG	GG	GG	GG	GG	AA	GG	AA	GG	AA	GG	AG	AA	GG	GG	GG	GG	AA	GG	AA	GG	AA	GG	AA	AG	AA	AG	AA	AG	GG	GG	AG	AA	GG	GG	GG	--	AA	GG	GG
Pv08_72119	CC	CC	CC	AA	CC	CC	AC	CC	CC	CC	--	AA	AA	CC	CC	--	CC	CC	CC	AA	CC	AA	CC	AC	CC	AA	AA	AA	AA	AA	AA	CC	AC	CC	CC	AC	CC	AA	CC	CC	CC	CC	CC	CC	CC	--	CC	CC	--
Pv08_747638	TG	GG	GG	TG	TT	TG	TT	GG	TG	TG	GG	TG	GG	TG	TG	TT	TG	TG	TT	TG	TG	GG	TT	TG	TT	TT	TG	TG	TG	GG	TT	TT	TT	TG	TG	TT	TG	TG	GG	GG	TT	TT	TG	GG	TG	--	TG	GG	TG
Pv09_1430436	GG	TT	TT	GG	GG	TG	TT	GG	GG	GG	TT	TT	TT	TT	GG	TT	GG	TT	GG	GG	GG	GG	--	TT	GG	TT	GG	TT	GG	GG	GG	GG	TG	TG	TG	GG	GG	GG	GG	TT	TG	GG	TT	GG	TG	--	TT	TT	GG
Pv09_1457147	AG	AA	AA	AA	AA	AG	GG	AA	AA	AA	GG	AA	AA	AA	AA	GG	AG	AA	GG	AA	AG	AA	GG	AA	AG	GG	GG	GG	AG	AA	GG	AA	AA	AG	AG	GG	GG	GG	GG	AA	GG	GG	AA	AA	AG	--	GG	GG	AA
Pv09_148307	AA	AA	--	--	AG	AG	AA	AA	AA	AA	AA	AA	GG	GG	AA	--	--	AA	GG	AA	GG	AA	AG	AA	AA	AA	AA	AA	AG	AA	GG	AG	AA	AA	AA	AA	AA	GG	GG	AA	--	GG	GG	--	--	--	AA	AA	GG
Pv09_398781	TT	AA	AA	TT	TT	AT	AA	TT	AA	AA	AA	AA	TT	TT	AT	TT	AA	TT	TT	AA	AT	TT	TT	AA	TT	AA	TT	TT	AT	TT	TT	TT	AT	AT	AT	TT	AA	AA	AA	TT	AT	TT	TT	TT	TT	--	AT	AA	TT
Pv09_445710	GG	GG	GG	AG	AA	AG	GG	GG	AA	AA	GG	AA	AA	GG	GG	GG	GG	GG	GG	GG	GG	GG	AG	AA	GG	GG	GG	AA	GG	AA	AA	AA	GG	AG	GG	AA	GG	AA	GG	AA	AG	AA	AA	AA	AG	--	AG	GG	GG
Pv09_780482	AA	AA	TT	AA	TT	AA	AA	AA	AA	AA	TT	AA	AA	AA	AA	AA	AA	AA	AA	AA	AA	AA	AA	TT	AA	AA	TT	AA	AA	AA	AA	TT	AT	AT	AA	AA	AA	AA	AA	AA	AA	TT	AA	AA	AA	--	AT	AA	AA
Pv09_800284	TT	TT	CC	TT	TT	TC	TT	CC	CC	CC	TT	TT	TT	TT	TC	TC	TT	CC	TT	CC	TC	TT	CC	TT	TT	TT	TT	TT	TC	CC	TT	TC	TT	TC	TT	TC	CC	CC	TT	CC	TT	TT	TT	TT	TC	--	TC	CC	CC
Pv10_1079004	--	TT	TT	TT	TT	TT	TT	TT	TT	TT	TT	TT	TT	TT	TT	--	TT	TT	TT	--	TT	TT	TT	TT	TT	TT	TT	TT	TT	TT	TT	TT	TT	TT	TT	TT	TT	--	TT	TT	TT	TT	TT	TT	TT	--	TT	TT	TT
Pv10_329085	AA	AA	CC	AA	AA	AC	AA	CC	AA	AA	AA	AA	AC	AA	AA	CC	AA	AA	AA	CC	AA	--	AA	AA	CC	AA	AA	AA	AC	AA	AA	AA	AC	AA	AC	CC	AA	CC	AA	CC	AC	AA	AA	CC	AC	--	AC	AA	AA
Pv10_362870	GG	AA	AA	GG	GG	AG	GG	AA	GG	GG	AG	AA	GG	GG	AA	AA	AG	GG	GG	GG	AG	GG	AG	GG	AG	GG	AG	GG	AG	AA	GG	GG	AG	GG	GG	AG	GG	AA	AA	GG	AA	AA	GG	AA	AA	--	AG	AA	GG
Pv10_415514	--	--	--	--	--	--	--	--	--	--	--	--	--	--	--	--	--	--	--	--	--	--	--	--	--	--	--	--	--	--	--	--	--	--	--	--	--	--	--	--	--	--	--	--	--	--	--	--	--
Pv10_435533	GG	CC	GG	GG	GG	CG	CC	GG	GG	GG	CG	GG	CC	CC	CG	GG	GG	GG	GG	CC	GG	CC	CG	GG	CG	CC	GG	GG	CG	CC	GG	GG	GG	GG	GG	CG	GG	GG	CC	CC	GG	GG	GG	GG	GG	--	GG	CC	GG
Pv10_55617	AA	GG	GG	AG	GG	AG	AA	AA	AA	AA	AA	GG	AA	AA	GG	GG	AA	GG	AA	GG	AA	GG	AG	GG	AG	AA	GG	AA	GG	AA	GG	GG	AG	AA	GG	AG	GG	GG	GG	GG	AG	GG	AA	GG	GG	--	AG	GG	GG
Pv10_742568	GG	GG	GG	GG	GG	GG	GG	GG	GG	GG	GG	GG	GG	GG	GG	GG	GG	GG	GG	GG	GG	GG	GC	GG	GG	GG	GG	GG	GG	GG	GG	GG	GG	GG	GG	GG	GG	GG	GG	GG	GC	GG	GG	GG	GC	--	GG	GG	GG
Pv10_905853	--	--	--	--	GG	GG	--	--	GG	GG	--	--	--	--	GG	--	--	--	--	--	--	--	GG	--	--	--	GG	--	GG	--	--	GG	--	--	GG	--	GG	--	--	GG	GG	--	--	--	GG	--	GG	GG	GG
Pv10_990752	GG	AA	GG	AA	AG	AG	GG	GG	GG	GG	GG	AA	AG	AA	GG	GG	AG	AA	AG	AA	AG	AA	AG	AA	AG	GG	GG	AG	AA	AA	GG	AG	AG	AG	GG	GG	GG	GG	GG	GG	AG	GG	AA	GG	AG	--	AG	AA	AA
Pv11_1406626	CC	TT	TT	CC	CC	TC	TC	CC	TT	TT	TT	TT	TT	TT	TC	TT	TT	TT	TT	CC	CC	TC	TC	CC	CC	TT	CC	TT	CC	TT	CC	CC	CC	CC	CC	CC	TT	CC	CC	TT	TT	TC	CC	TT	CC	--	TC	TT	CC
Pv11_1483242	--	AA	AA	AA	--	GG	--	AA	GG	GG	GG	GG	AA	AA	AA	GG	AG	GG	GG	AA	AG	GG	--	--	AA	AA	AA	AA	AG	GG	AA	AA	AA	GG	GG	AG	AA	GG	AA	AA	GG	AG	AA	GG	--	--	AG	AA	--
Pv11_239520	AA	GG	GG	GG	AA	AG	GG	AA	AA	AA	AA	AA	GG	AA	AG	GG	AG	GG	GG	AA	AG	AA	AA	AA	AG	GG	AG	AA	AG	AA	AA	AA	GG	AG	AG	AG	AA	GG	GG	GG	AG	GG	AA	AA	AG	--	GG	AA	AG
Pv11_368766	GG	GG	GG	GG	GG	AG	AA	AA	GG	GG	GG	AA	GG	GG	AA	GG	GG	GG	GG	GG	GG	GG	GG	GG	GG	AA	GG	AA	AA	GG	GG	GG	GG	GG	GG	GG	GG	GG	GG	GG	GG	GG	GG	GG	GG	--	GG	AA	GG
Pv11_569629	TT	TT	TT	TT	TT	TT	TT	TT	GG	GG	TT	TT	TT	TT	TT	TT	TT	TT	TT	TT	TT	TT	TT	GG	TT	TT	TT	TT	TT	TT	TT	TT	TT	TT	TT	TT	TT	TT	TT	TT	TT	TT	GG	TT	TT	--	TT	TT	TT
Pv11_764358	GG	GG	GG	GG	--	GG	GG	GG	GG	GG	GG	GG	GG	GG	AG	GG	AG	GG	GG	GG	GG	GG	GG	GG	GG	GG	GG	GG	GG	GG	GG	GG	GG	AA	GG	GG	GG	GG	GG	GG	GG	GG	GG	GG	AA	--	AG	GG	GG
Pv11_805674	--	AA	AA	GG	GG	AG	GG	GG	--	GG	GG	--	GG	GG	GG	GG	AA	GG	GG	GG	AA	--	GG	GG	AG	GG	AA	AA	GG	GG	GG	GG	--	--	AG	GG	GG	GG	GG	GG	AG	GG	AA	GG	GG	--	GG	GG	AG
Pv11_926923	CC	TT	CC	CC	TT	CC	CC	TT	CC	CC	TT	CC	CC	CC	TT	CC	CC	CC	CC	TT	CC	CC	CC	CC	TT	CC	TT	CC	CC	TT	TT	TT	TT	TT	CC	CC	CC	CC	CC	TT	TC	TT	CC	CC	TT	--	TC	CC	TC
Pv12_1185180	GG	AA	GG	GG	GG	AA	GG	GG	AA	AA	GG	GG	GG	GG	GG	GG	GG	GG	GG	GG	GG	GG	GG	AA	GG	GG	GG	GG	GG	GG	GG	GG	GG	GG	GG	GG	GG	GG	GG	GG	AG	GG	GG	GG	GG	--	GG	GG	AG
Pv12_1410920	AA	GG	AA	AG	AA	GG	AA	AA	AA	AA	AA	AA	AA	AA	GG	GG	AA	AA	AA	AA	AA	GG	AA	AA	AG	AA	AG	AA	AG	AA	AA	AG	AA	AA	AA	AA	AA	AA	AA	AA	AG	AA	GG	GG	AA	--	AG	GG	AA
Pv12_1752233	CC	CC	GG	GG	CC	GC	GG	CC	GG	GG	CC	CC	CC	CC	CC	CC	CC	CC	CC	CC	GG	GG	CC	CC	CC	GG	GC	CC	CC	CC	CC	CC	CC	CC	CC	CC	CC	CC	CC	CC	CC	CC	GG	GG	CC	--	GC	CC	CC
Pv12_1796509	CC	CC	CC	CC	CC	CC	CC	GG	CC	CC	CC	CC	CC	CC	CC	CC	CC	CC	GG	CC	CC	CC	CC	CC	CC	CC	CC	CC	CC	CC	CC	CC	GC	CC	CC	GC	GG	CC	CC	CC	CC	CC	CC	CC	CC	--	CC	CC	CC
Pv12_205690	CC	CC	CC	CC	CC	CC	TT	CC	CC	CC	CC	CC	CC	CC	CC	CC	CC	TT	CC	CC	CC	CC	CC	CC	CC	TT	CC	CC	TC	CC	CC	CC	TC	CC	CC	CC	CC	CC	CC	CC	TC	CC	CC	CC	TC	--	CC	CC	TT
Pv12_2192552	GG	GG	CC	GG	GG	CG	CC	CC	CC	CC	CC	CC	GG	CC	GG	CC	GG	GG	CC	GG	CG	GG	GG	GG	CG	CC	GG	CC	GG	GG	GG	GG	CG	GG	GG	GG	GG	CC	GG	GG	CG	GG	GG	GG	CG	--	GG	CC	GG
Pv12_2279221	GG	GG	GG	GG	--	GG	GG	GG	GG	GG	GG	GG	GG	GG	TT	GG	GG	TT	GG	GG	GG	GG	GG	GG	TG	GG	GG	GG	GG	GG	TT	TT	GG	TG	GG	GG	GG	GG	GG	GG	TG	GG	GG	GG	TT	--	GG	GG	GG
Pv12_239990	CC	TT	TT	CC	TC	TC	CC	TT	CC	CC	TC	CC	CC	CC	CC	TT	TC	TT	TC	TT	TC	CC	TC	CC	TC	CC	TT	TT	TC	TT	CC	TT	TC	CC	TC	TC	TT	CC	CC	TT	TC	TT	CC	TT	TC	--	TC	CC	TT
Pv12_2419371	AA	AA	AA	AA	AA	AA	AA	AA	AA	AA	AA	AA	AA	AA	AG	AA	AA	AA	AA	AA	AA	GG	AA	AA	AA	AA	AA	AA	AA	AA	AA	AA	AA	AA	AA	AA	AA	AA	AA	AA	AG	AA	AA	GG	AG	--	AA	AA	AA
Pv12_2667491	GC	CC	CC	GG	CC	GC	GG	GG	CC	CC	CC	CC	CC	CC	GC	GG	GC	CC	GG	CC	CC	CC	GG	CC	GC	GG	GC	GC	GG	CC	CC	CC	CC	GG	GC	CC	CC	GG	GG	GG	GC	GG	CC	CC	CC	--	CC	CC	GC
Pv12_2933890	TT	TT	TT	TT	TG	TG	GG	GG	GG	GG	TT	TT	TG	GG	TT	TT	TG	TT	TT	GG	TG	TT	TG	TT	TG	GG	TT	TT	TT	GG	TT	TG	TT	TG	TT	TT	GG	GG	TT	GG	TG	TT	TT	TT	TT	--	TG	TT	TG
Pv12_3003775	CC	CC	TT	TT	CC	TC	CC	CC	CC	CC	CC	TT	TT	CC	TC	CC	CC	CC	CC	CC	CC	CC	CC	TT	CC	CC	CC	TT	TT	CC	--	CC	CC	CC	CC	CC	CC	CC	CC	TT	CC	CC	TT	CC	CC	--	--	CC	CC
Pv12_863346	TT	--	TT	TT	--	TT	--	TT	TT	TT	--	TT	--	--	TT	--	--	--	TT	TT	TT	--	--	--	TT	--	--	TT	TT	--	--	--	--	--	TC	TT	TT	--	--	TT	TT	--	--	--	TT	--	TC	--	TT
Pv13_1229481	--	--	--	--	--	--	--	--	--	--	--	--	--	--	--	--	--	--	--	--	--	--	--	--	--	--	--	--	--	--	--	--	--	--	--	--	--	--	--	--	--	--	--	--	--	--	--	--	--
Pv13_1354999	TT	TT	TT	TT	TT	AT	AA	AA	AA	AA	AA	AA	AA	TT	AA	TT	AA	TT	AT	TT	AT	TT	AT	AA	AT	AA	AT	AA	AA	AA	AA	TT	AA	AT	TT	AA	TT	AA	TT	TT	AA	TT	TT	AA	TT	--	AT	TT	TT
Pv13_1834684	GG	AA	GG	GG	AA	GG	AA	AA	AA	AA	AA	AA	AA	GG	GG	GG	GG	AA	AA	AA	AG	GG	GG	AA	AA	AA	GG	GG	AG	AA	AA	AA	AA	AG	AA	AA	AA	AA	AA	AA	AA	AA	GG	AA	AA	--	AG	AA	AA
Pv13_1912361	GG	GG	GG	GG	AA	GG	GG	GG	GG	GG	GG	GG	GG	GG	GG	GG	GG	GG	GG	GG	GG	GG	GG	GG	GG	GG	AG	GG	AG	GG	GG	AA	GG	GG	GG	GG	GG	GG	GG	GG	GG	GG	GG	GG	GG	--	AG	GG	GG
Pv13_259864	CC	AA	CC	AA	CC	AC	AA	CC	CC	CC	CC	CC	CC	CC	AC	AA	CC	CC	CC	AA	AC	AA	AA	CC	AA	AA	AA	AA	AC	CC	AA	CC	CC	AC	CC	AA	CC	CC	AA	AA	AC	AA	CC	CC	CC	--	AC	CC	CC
Pv13_308456	TT	TT	TT	TT	TT	TG	TT	TT	TT	TT	GG	GG	TT	TT	TT	TT	TT	TT	TT	TT	TG	TT	TT	TT	TT	TT	TG	TT	TT	GG	TT	TT	TT	TT	TG	TT	GG	TT	TT	TT	TT	TT	TT	TT	GG	--	TT	TT	TT
Pv13_670891	CC	CC	CC	CC	CC	CC	CC	CC	CC	CC	CC	AA	CC	CC	CC	CC	CC	CC	CC	AA	CC	CC	CC	CC	AC	CC	CC	CC	CC	CC	CC	CC	CC	CC	AC	CC	AA	CC	CC	CC	CC	AA	CC	CC	CC	--	CC	AA	CC
Pv13_705424	TT	TT	TT	TG	GG	TG	TT	GG	GG	GG	TT	GG	GG	TT	TG	TT	TT	TT	GG	GG	TG	TT	TG	TT	GG	TT	GG	TG	TT	TT	TT	GG	TT	TG	TG	TG	TT	GG	TT	TT	TG	TT	TT	GG	TT	--	GG	TT	TT
Pv13_850957	AA	GG	AA	GG	GG	GG	GG	AA	GG	GG	GG	GG	GG	GG	AG	GG	AG	GG	GG	GG	GG	GG	GG	GG	GG	GG	AG	AA	GG	GG	GG	GG	AG	GG	GG	GG	GG	GG	GG	GG	GG	GG	GG	GG	GG	--	AG	GG	AG
Pv14_1077928	CC	CC	CC	GC	CC	CC	CC	GG	GG	GG	GG	GG	CC	GG	GG	GG	GC	GG	GC	GG	GC	CC	GG	CC	GG	CC	GG	GG	GC	GG	GG	CC	GG	GC	GG	GG	CC	GG	CC	CC	CC	CC	CC	GG	GG	--	GC	CC	CC
Pv14_1703896	AG	GG	AA	AA	GG	GG	GG	GG	GG	GG	GG	GG	GG	GG	AG	GG	GG	GG	GG	AA	GG	GG	GG	AA	GG	GG	GG	GG	AG	AA	GG	GG	GG	AG	GG	GG	GG	AA	AA	GG	AG	GG	GG	AA	GG	--	GG	AA	GG
Pv14_2003760	TT	CC	TT	--	--	TC	TT	CC	TC	TC	CC	CC	TT	TT	TT	TT	TT	TT	TT	CC	TT	CC	--	TT	TT	TT	TT	TT	--	TT	TT	TT	TC	TT	TT	--	CC	TT	TT	TT	TT	CC	CC	TT	TT	--	TT	TT	TT
Pv14_2042312	CC	TT	CC	CC	TT	TT	CC	TT	CC	CC	TT	CC	TC	CC	CC	CC	CC	TT	CC	CC	CC	TT	CC	CC	TC	CC	TC	CC	TC	TT	CC	TT	TC	CC	CC	TC	CC	TT	TT	CC	TC	TT	CC	TT	CC	--	TC	CC	TT
Pv14_2148184	GG	GG	GG	GG	GG	GG	GG	GG	GG	GG	GG	GG	GG	GG	GG	GG	GG	GG	TG	GG	GG	GG	GG	GG	GG	GG	GG	GG	GG	GG	GG	GG	GG	TG	GG	GG	GG	GG	GG	GG	TT	GG	GG	GG	GG	--	GG	TT	GG
Pv14_2440112	AA	AA	AA	--	AA	AG	AA	AA	AA	AA	GG	AA	GG	AA	GG	GG	--	AA	AG	AA	AA	GG	--	AA	AA	AA	AA	GG	AG	AA	AA	AA	AG	AG	AA	AA	AA	AA	AA	GG	AG	AA	AA	AA	AG	--	AG	AA	AA
Pv14_2549860	CC	TT	CC	CC	TC	TC	CC	CC	CC	CC	TT	TT	CC	TT	TT	TT	CC	TT	TT	TT	TC	CC	CC	TT	TT	CC	TC	CC	CC	CC	TT	TC	TT	TC	CC	TT	CC	TT	CC	CC	CC	CC	TT	CC	TT	--	CC	TT	TC
Pv14_2704545	TT	TT	TT	TT	TT	TT	TT	TT	TT	TT	TT	TT	TT	CC	TT	TT	TT	CC	TT	TT	CC	TT	CC	TT	TC	TT	TT	TT	TT	CC	TT	TT	TT	TT	TT	TT	TT	TT	TT	TT	TT	CC	TT	TT	TT	--	TT	TT	TT
Pv14_2916900	TT	TT	TT	CC	TC	TT	TT	TT	TT	TT	TT	TT	TT	TT	TT	CC	TT	TT	TT	TT	TT	CC	TT	TT	TT	TT	TT	TT	TC	TT	TT	CC	TC	TC	TT	TT	TT	TT	CC	TT	TT	TT	CC	CC	TC	--	TT	TT	TT
Pv14_2963845	CC	TT	TT	CC	TC	TC	CC	CC	CC	CC	TT	CC	CC	TT	TC	TT	CC	TT	TC	TT	CC	TT	CC	CC	TT	CC	TC	TC	TT	CC	TT	TC	TC	CC	TT	TT	TT	CC	CC	TT	CC	CC	CC	CC	TC	--	CC	TT	TT
Pv14_764662	AA	TT	TT	TT	TT	TT	TT	TT	TT	TT	TT	TT	AA	AA	AT	AA	AT	TT	TT	TT	TT	TT	TT	TT	AT	TT	TT	TT	TT	TT	TT	TT	TT	TT	TT	TT	TT	AA	TT	AA	TT	TT	TT	TT	TT	--	AT	AA	TT
[truncated: 227 more columns]
